# Supplementary material for: Organic–inorganic haloargentate hybrids of [Me-dabco]Ag2X3 (X = I or Br) with halide ions manipulating the crystal structure, phase transition, and dielectric behavior
Source: Royal Society of Chemistry journal article supplement (doi:10.1039/d3dt01366a), 2023-01-01
Supplement: d3dt01366a1.pdf [file d3dt01366a1.pdf]

## Supporting Information

Organic-inorganic haloargentate hybrids of [Me-dabco]Ag<sub>2</sub>X<sub>3</sub>  
(X = I or Br) with halide ion manipulating crystal structure,  
phase transition and dielectric behavior

Xue-Wei Pan,<sup>a</sup> Qing-Qing Li,<sup>a</sup> Lu Zhai,<sup>\*a</sup> Jin Zhang,<sup>a</sup> Wen-Long Liu,<sup>b</sup> Xiao-Ming Ren<sup>\*a,c</sup>

<sup>a</sup> State Key Laboratory of Materials-Oriented Chemical Engineering and College of Chemistry and Molecular Engineering, Nanjing Tech University, Nanjing 211816, P. R. China

<sup>b</sup> College of Chemistry and Chemical Engineering, Yangzhou University, Yangzhou 225002, P. R. China

<sup>c</sup> State Key Laboratory of Coordination Chemistry, Nanjing University 210023, P. R. China

Tel: 86-25-58139476

E-mail: [zhailu@njtech.edu.cn](mailto:zhailu@njtech.edu.cn) (LZ); [xmren@njtech.edu.cn](mailto:xmren@njtech.edu.cn) (XMR)

## Table of Contents

### A. Characterizations

### B. Supporting Fig.s

**Fig. S1.** (a) The chemical structure and (b)  $^1\text{H-NMR}$  spectra of as-synthesized  $[\text{Me-dabco}]\text{I}$ .

**Fig. S2.** (a) The chemical structure and (b)  $^1\text{H-NMR}$  spectra of as-synthesized  $[\text{Me-dabco}]\text{Br}$ .

**Fig. S3.** Photographs of as-grown crystals of (a) **1** and (b) **2**.

**Fig. S4.** The experimental PXRD patterns obtained at room temperature and simulated ones based on the single crystal structures of **1** and **2**.

**Fig. S5.** FT-IR spectrum of **1** and **2** with  $[\text{Me-dabco}]\text{X}$  ( $\text{X} = \text{I}$  or  $\text{Br}$ ).

**Fig. S6.** Raman spectra of **1** and **2** with  $[\text{Me-dabco}]\text{X}$  ( $\text{X} = \text{I}$  or  $\text{Br}$ ) obtained at different wavenumber range of (a)  $57\text{--}3300\text{ cm}^{-1}$ , (b)  $57\text{--}400\text{ cm}^{-1}$ .

**Fig. S7.** TG curves of (a) **1** and (b) **2** in a  $\text{N}_2$  atmosphere.

**Fig. S8.** Polyhedral view of the inorganic  $\alpha$ -type neutral chain along (a)  $a$ -, (b)  $b$ - and (c)  $c$ -axis.

**Fig. S9.** Polyhedral view of the inorganic  $\beta$ -type neutral chain along (a)  $a$ -, (b)  $b$ - and (c)  $c$ -axis.

**Fig. S10.** Polyhedral view of the inorganic  $\gamma$ -type neutral chain along (a)  $a$ -, (b)  $b$ - and (c)  $c$ -axis.

**Fig. S11.** Polyhedral view of the inorganic  $\delta$ -type neutral chain along (a)  $a$ -, (b)  $b$ - and (c)  $c$ -axis.

**Fig. S12.** Polyhedral view of the inorganic  $\varepsilon$ -type anionic chain along (a)  $a$ -, (b)  $b$ - and (c)  $c$ -axis.

**Fig. S13.** Polyhedral view of the inorganic  $\zeta$ -type anionic chain along (a)  $a$ -, (b)  $b$ - and (c)  $c$ -axis.

**Fig. S14.** The first three thermal cycles of **1** in the temperature range of  $185\text{--}427\text{ K}$

**Fig. S15.** Variable-temperature PXRD patterns of **1** within the  $2\theta$  range of  $5\text{--}50^\circ$

**Fig. S16** (a) The comparison of SHG intensity between **2** and KDP at room temperature; (b) temperature-dependent SHG response of **2**.

### **C. Supporting Tables**

**Table S1.** The crystal data and structure refinement for **1** and **2**

**Table S2.** Assignment of IR peaks of **1** and **2**

**Table S3.** Bond lengths [ $\text{\AA}$ ] for **1** at 273 K

**Table S4.** Bond angles [ $^\circ$ ] for **1** at 273 K

**Table S5.** Bond lengths [ $\text{\AA}$ ] for **2** at 273 K

**Table S6.** Bond angles [ $^\circ$ ] for **2** at 273 K

### **D. References**

## **A. Characterizations**

### **Reagents and materials**

All chemicals and reagents, including 1,4-diazabicyclo[2.2.2]octane (Dabco), AgNO<sub>3</sub>, KI, KBr, methyl iodide, methyl bromide, N, N-dimethylformamide (DMF), acetone, methanol and ethanol were purchased from commercial suppliers and used as received.

### **General Methods**

#### **<sup>1</sup>H-NMR spectra**

<sup>1</sup>H-NMR spectra of [Me-dabco]Br and [Me-dabco]I were recorded using a Bruker AVANCE III 400MHz NMR spectrometer. Both samples were prepared in DMSO-d<sub>6</sub> solution form.

#### **Single crystal structure**

Single crystal structures of **1** and **2** were determined by Bruker SMART APEX-II diffractometer equipped with a CCD detector by Mo-K $\alpha$  irradiation (wavelength equal to 0.71073 Å) at room temperature. The structure was analyzed by direct methods and refined with full-matrix least-square methods based on F<sup>2</sup> (SHELXL-2014 software package). All non-hydrogen atoms of the structure were refined anisotropically, hydrogen atoms were positioned geometrically and allowed to ride on their parent atoms with constrained thermal parameters. Crystal data and structure refinement parameters of **1** and **2** are summarized in Table S1. The CIF files of all structures can be found in the CCDC Database with deposition No. 2251761 and 2251765.

#### **Powder X-ray diffraction (PXRD)**

PXRD of polycrystalline powder was carried out by a MiniFlex600 X-ray diffractometer with Cu K $\alpha$  ( $\lambda = 1.5404$  Å) radiation in the 2-theta ranges of 5-50° with a step length of 0.02° to check the phase purity of the as-grown crystals, as given in Fig. S4.

#### **IR and Raman spectra**

The infrared (IR) and Raman measurements were measured to check the phases of the as-grown crystals. IR spectrum was recorded on a Thermo Scientific Nicolet iS10

spectrophotometer in the regime of 700–4000  $\text{cm}^{-1}$ . Raman spectra was conducted on a Thermo Fisher Scientific DXR2 instrument with a 785 nm laser light irradiation from 57–3300  $\text{cm}^{-1}$ . The results are presented in Fig. S5 and S6, with the characteristic peaks were identified as listed in Table S2.

### **TG and DSC**

Thermogravimetric (TG) analysis was performed by TA2000 / 2960 analyzer in  $\text{N}_2$  flow with a heating rate of 10 K/min in 307-800 K. Differential scanning calorimetry (DSC) measurement was taken by using a NETZSCH DSC 204F1 Phoenix calorimetry for powdered samples between  $-90$  and  $200$   $^{\circ}\text{C}$  with a scan speed of  $10$   $^{\circ}\text{C}/\text{min}$ . As shown in Fig. S7, the two samples show similar three-step thermal decomposition behaviors, and thermal decomposition occurs at 553 and 529 K with significant mass loss percentage of 35.4 and 31.6 %, which corresponds to the release of the organic components [Me-dabco]X (X = I or Br) with the calculated mass loss of 35.1 and 35.5% for **1** and **2**, respectively.

### **Dielectrics**

Alternating current (AC) conductivities, impedance spectra, and dielectric were measured under  $\text{N}_2$  atmosphere using a Concept 80 system (Novocontrol, Germany) from  $-20$  to  $200$   $^{\circ}\text{C}$  with the frequency of  $1-10^7$  Hz. The powder sample was pressed into a pellet with a diameter of 7 mm. The pellet was layered between two parallel platinum electrodes.

## B. Supporting Fig.s

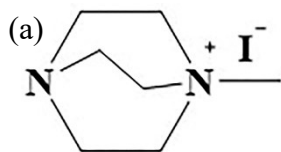

1-Methyl-1, 4-diazabicyclo[2.2.2]octan-1-ium Iodide

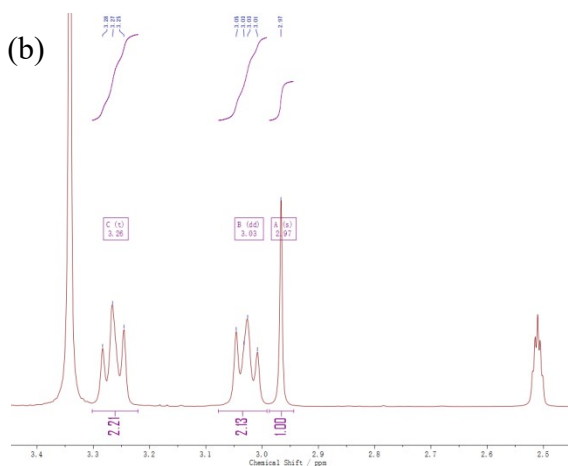

**Fig. S1** (a) The chemical structure and (b)  $^1\text{H}$ -NMR spectra of as-synthesized [Me-dabco]I (400 MHz, DMSO- $d_6$ ): 2.96-2.98 (3 H,  $\text{CH}_3$ ), 3.00-3.05 (6 H, 3  $\text{CH}_2$ ), 3.24-3.29 (6 H, 3  $\text{CH}_2$ ), 3.33-3.36 ( $\text{H}_2\text{O}$ ), 2.50-2.52 (DMSO- $d_6$ ).

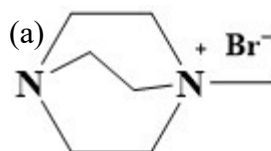

1-Methyl-1, 4-diazabicyclo[2.2.2]octan-1-ium bromide

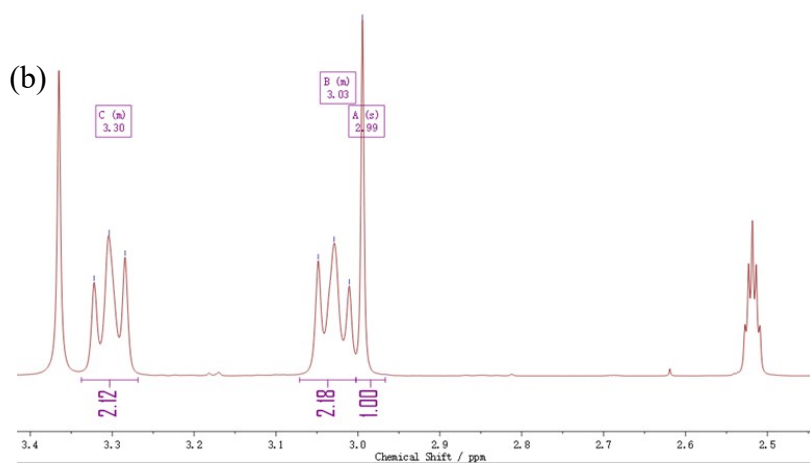

**Fig. S2** (a) The chemical structure and (b)  $^1\text{H}$ -NMR spectra of as-synthesized [Me-dabco]Br (400 MHz, DMSO- $d_6$ ): 2.98-3.00 (3 H,  $\text{CH}_3$ ), 3.00-3.06 (6 H, 3  $\text{CH}_2$ ), 3.28-3.33 (6 H, 3  $\text{CH}_2$ ), 3.35-3.37 ( $\text{H}_2\text{O}$ ), 2.50-2.53 (DMSO- $d_6$ ).

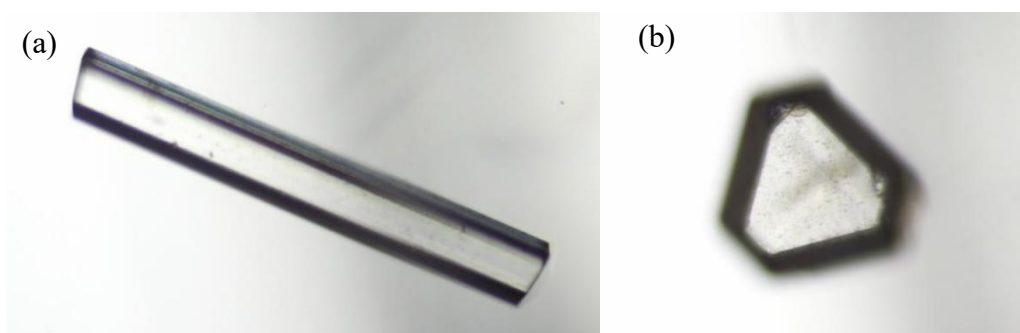

**Fig. S3.** Photographs of as-grown crystals of (a) **1** and (b) **2**.

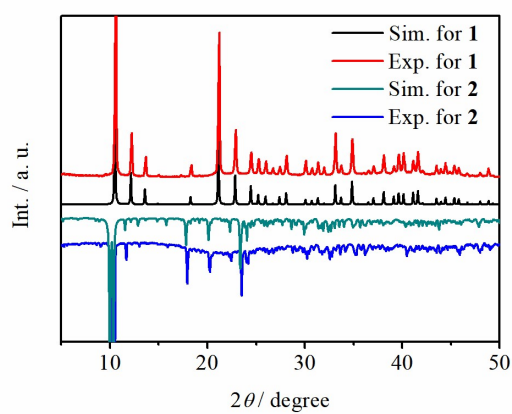

**Fig. S4** The experimental PXRD patterns obtained at room temperature and simulated ones based on the single crystal structures of **1** and **2**.

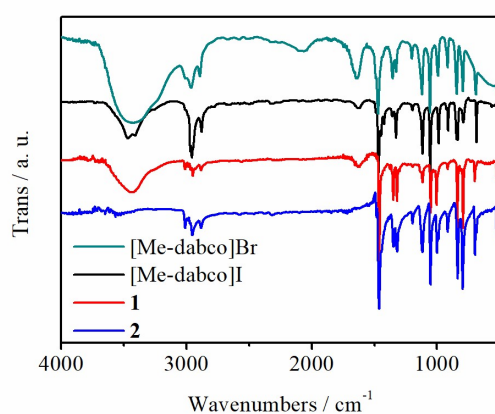

**Fig. S5.** FT-IR spectrum of **1** and **2** with [Me-dabco]X (X = I or Br).

Raman spectra of **1** and **2** are shown in Fig. S6. For **1**, the bands at 72 and

433–3014  $\text{cm}^{-1}$  are assigned to the Raman active vibrations of  $[\text{Me-dabco}]\text{I}$ .<sup>1</sup> Compared with pure  $[\text{Me-dabco}]\text{I}$ , there are two new bands with Raman shifts of 90 and 110  $\text{cm}^{-1}$  in the Raman spectra of **1** (Fig. S6), and these Raman active bands are attributed to the symmetrical stretching of Ag–I bonds and Ag lattice vibrational modes. It is worth noting that compared with pure AgI, the above two bands of **1** shift to higher wavenumbers, which may be related to the stronger bond energy of Ag–I bond. For **2**, The Raman spectrum is similar to that of pure  $[\text{Me-dabco}]\text{Br}$  except the band at 133  $\text{cm}^{-1}$ . Given that AgBr has the characteristic peak at the same position, this peak may be attributed to the stretching vibrations between  $\text{Ag}^+$  and  $\text{Br}^-$  ions.<sup>2</sup>

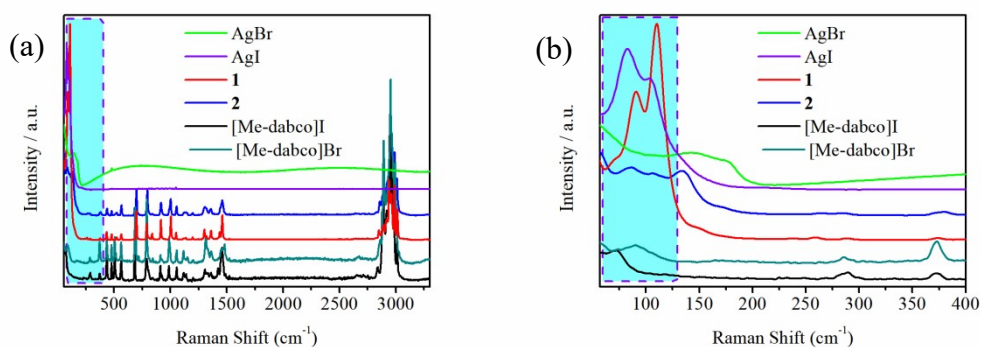

**Fig. S6** Raman spectra of **1** and **2** with  $[\text{Me-dabco}]\text{X}$  ( $\text{X} = \text{I}$  or  $\text{Br}$ ) obtained at different wavenumber range of (a) 57–3300  $\text{cm}^{-1}$ , (b) 57–400  $\text{cm}^{-1}$ .



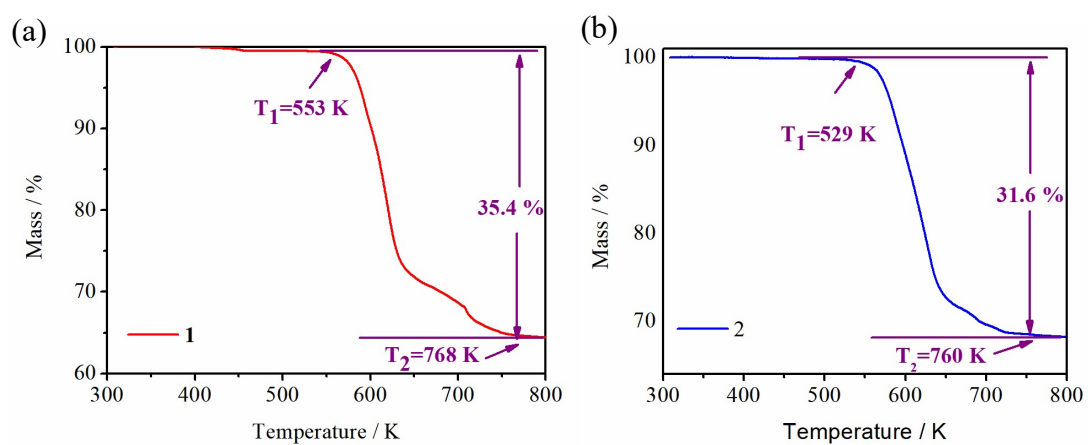

**Fig. S7** TG curves of (a) **1** and (b) **2** in a N<sub>2</sub> atmosphere.

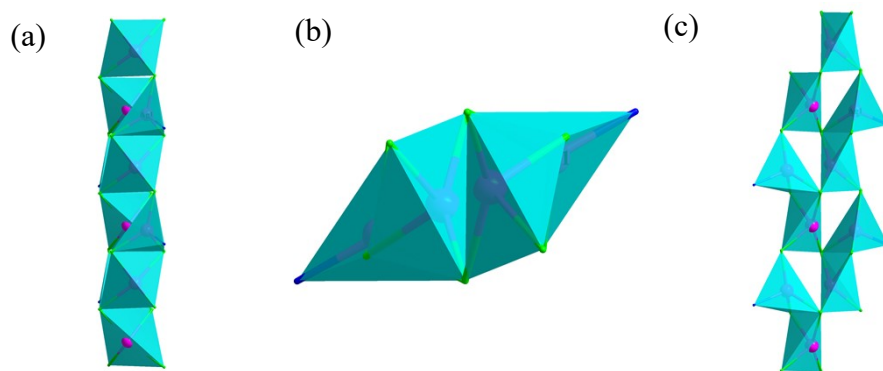

**Fig. S8.** Polyhedral view of the inorganic  $\alpha$ -type neutral chain along (a)  $a$ -, (b)  $b$ - and (c)  $c$ -axis.

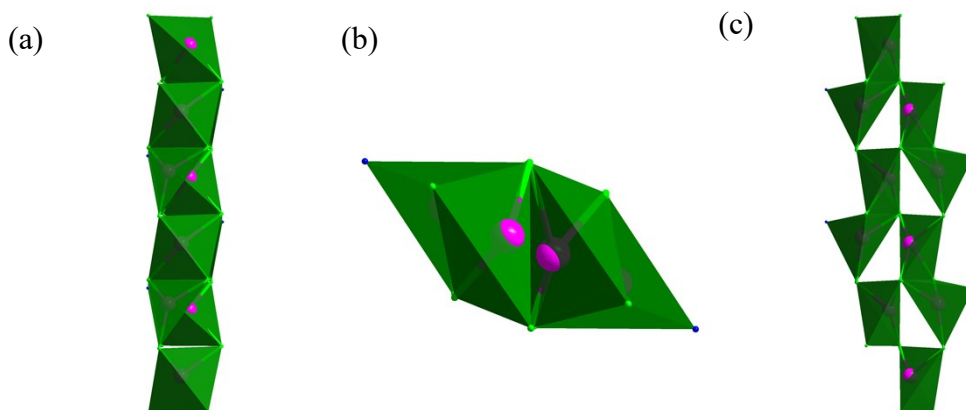

**Fig. S9.** Polyhedral view of the inorganic  $\beta$ -type neutral chain along (a)  $a$ -, (b)  $b$ - and (c)  $c$ -axis.

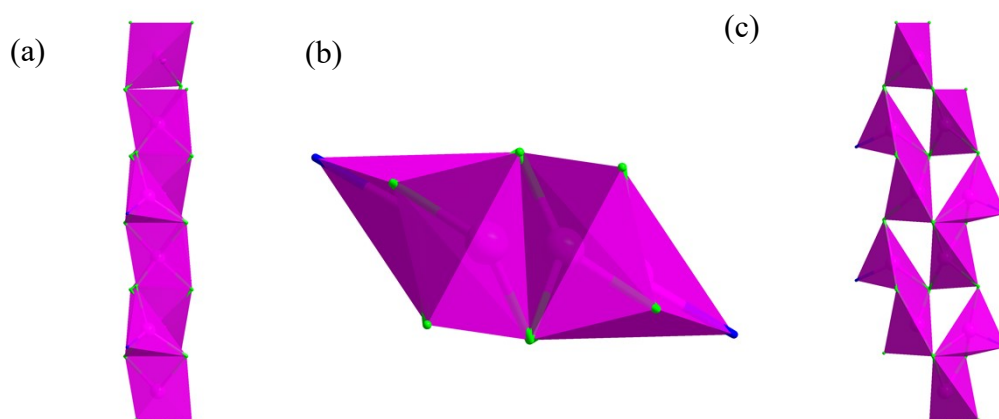

**Fig. S10.** Polyhedral view of the inorganic  $\gamma$ -type neutral chain along (a)  $a$ -, (b)  $b$ - and (c)  $c$ -axis.

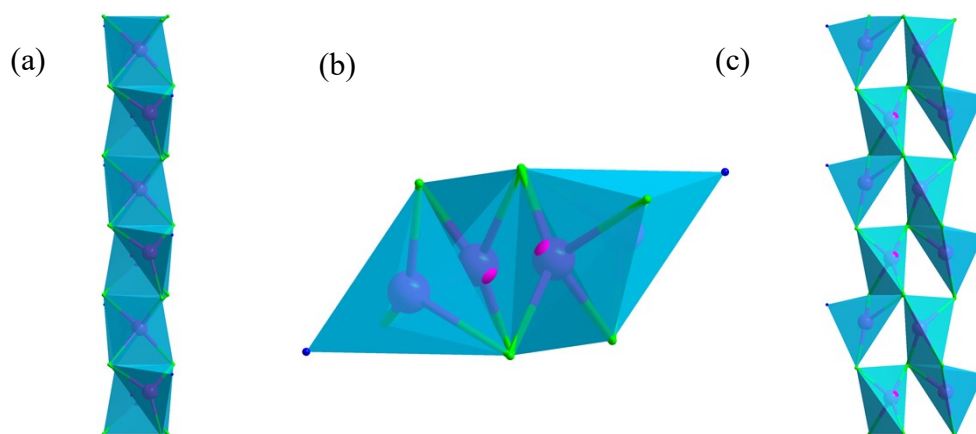

**Fig. S11.** Polyhedral view of the inorganic  $\delta$ -type neutral chain along (a)  $a$ -, (b)  $b$ - and (c)  $c$ -axis.

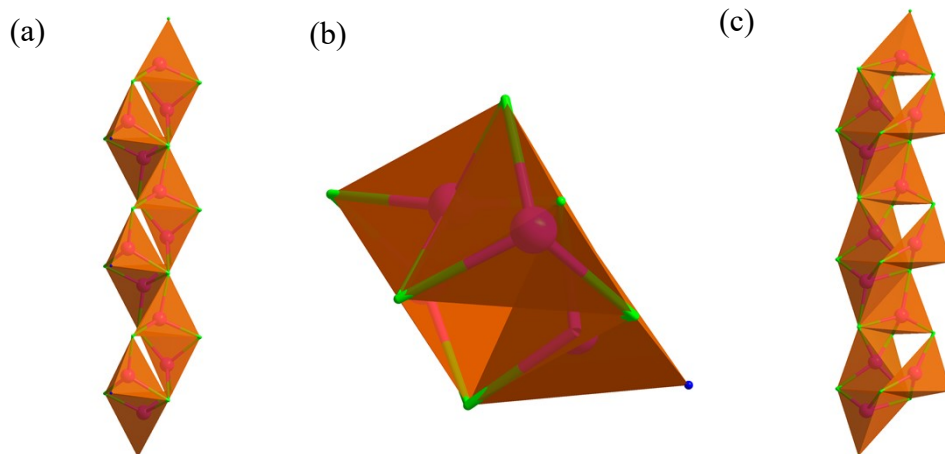

**Fig. S12.** Polyhedral view of the inorganic  $\epsilon$ -type anionic chain along (a)  $a$ -, (b)  $b$ - and (c)  $c$ -axis.

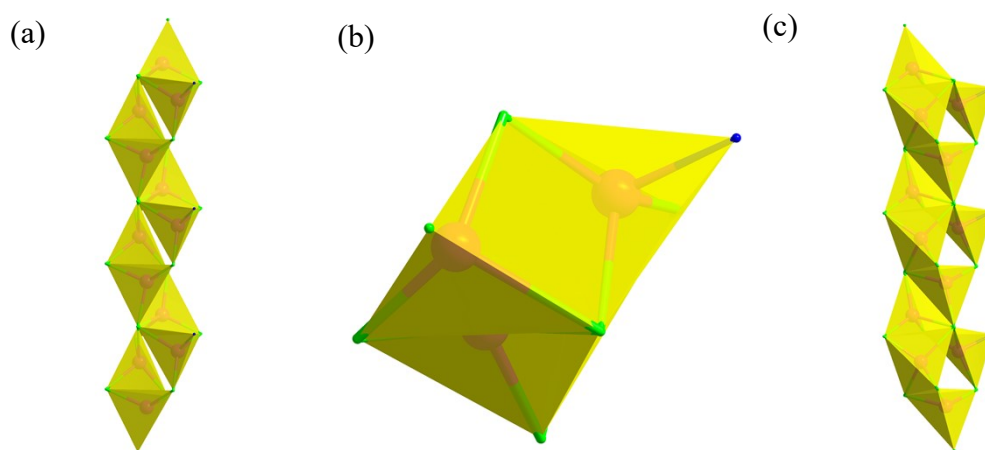

**Fig. S13.** Polyhedral view of the inorganic  $\zeta$ -type anionic chain along (a)  $a$ -, (b)  $b$ - and (c)  $c$ -axis.

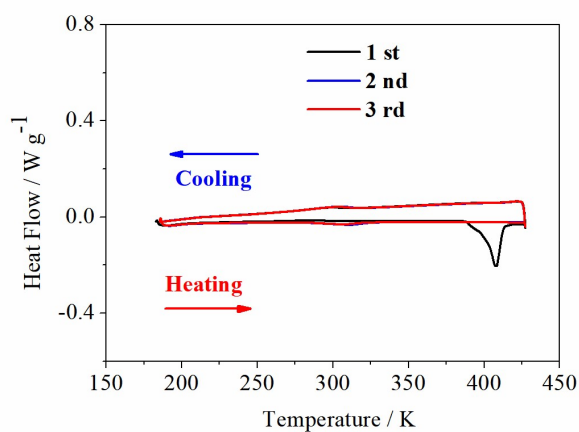

**Fig. S14** The first three thermal cycles of **1** in the temperature range of 185–427 K.

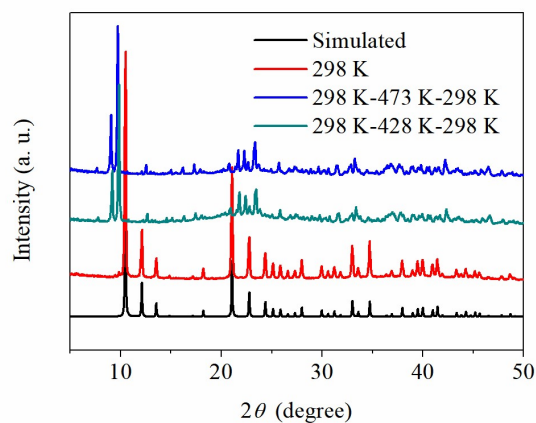

**Fig. S15** Variable-temperature PXRD patterns of **1** within the  $2\theta$  range of 5–50°.

Since **2** crystallize in a noncentrosymmetric space group ( $P2_1$ ), its second-harmonic generation (SHG) response was measured, using the Kurtz–Perry method with a home-built scanning microscope using an Nd:YAG laser (wavelength of 1064 nm, input pulse power of 400 mV) in reflection geometry. As displayed in Fig. S16a, **2** did exhibit SHG signal, even if very weak.

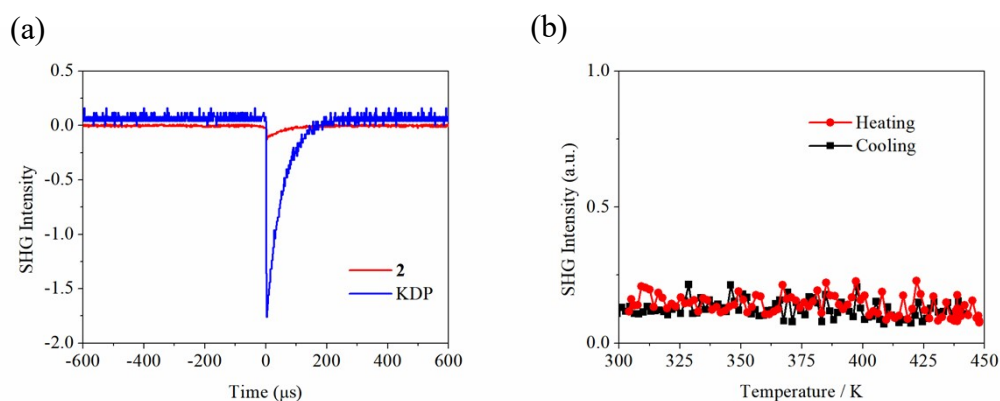

**Fig. S16** (a) The comparison of SHG intensity between **2** and KDP at room temperature; (b) temperature-dependent SHG response of **2**.

### C. Supporting Tables

**Table S1** The crystallographic and structure refinement data for **1** and **2**

|                                                              | <b>1</b>                                                                     | <b>2</b>                                                                      |
|--------------------------------------------------------------|------------------------------------------------------------------------------|-------------------------------------------------------------------------------|
| Chemical formula                                             | C <sub>7</sub> H <sub>15</sub> N <sub>2</sub> Ag <sub>2</sub> I <sub>3</sub> | C <sub>7</sub> H <sub>15</sub> N <sub>2</sub> Ag <sub>2</sub> Br <sub>3</sub> |
| CCDC number                                                  | 2251761                                                                      | 2251765                                                                       |
| Formula weight                                               | 723.65                                                                       | 582.65                                                                        |
| Crystal system                                               | Cubic                                                                        | Monoclinic                                                                    |
| Space group                                                  | <i>Pa</i> -3                                                                 | <i>P</i> 2 <sub>1</sub>                                                       |
| <i>a</i> / Å                                                 | 14.5961(3)                                                                   | 20.6830(17)                                                                   |
| <i>b</i> / Å                                                 | 14.5961(3)                                                                   | 7.4510(6)                                                                     |
| <i>c</i> / Å                                                 | 14.5961(3)                                                                   | 34.055(3)                                                                     |
| $\alpha$ / °                                                 | 90                                                                           | 90                                                                            |
| $\beta$ / °                                                  | 90                                                                           | 90.169(3)                                                                     |
| $\gamma$ / °                                                 | 90                                                                           | 90                                                                            |
| <i>V</i> (Å <sup>3</sup> ) / <i>Z</i>                        | 3109.64(19)/4                                                                | 5248.1(8)/1                                                                   |
| Calc. density g/cm <sup>3</sup>                              | 3.091                                                                        | 2.950                                                                         |
| Abs. coeff. $\mu$ /mms                                       | 8.448                                                                        | 12.088                                                                        |
| <i>F</i> (000)                                               | 2592                                                                         | 4321                                                                          |
| $\theta$ range for data collection / °                       | 3.121 to 26.378                                                              | 1.969 to 27.495                                                               |
| Index range                                                  | -16 ≤ <i>h</i> ≤ 18<br>-18 ≤ <i>k</i> ≤ 12<br>-17 ≤ <i>l</i> ≤ 18            | -25 ≤ <i>h</i> ≤ 26<br>-9 ≤ <i>k</i> ≤ 9<br>-44 ≤ <i>l</i> ≤ 43               |
| Refl. collected/unique                                       | 10993 / 1066                                                                 | 49598 / 22445                                                                 |
| <i>R</i> <sub>int</sub>                                      | 0.0712                                                                       | 0.0500                                                                        |
| Goodness-of-fit on <i>F</i> <sup>2</sup>                     | 1.075                                                                        | 1.030                                                                         |
| Final <i>R</i> indices [ <i>I</i> > 2 $\sigma$ ( <i>I</i> )] | <i>R</i> <sub>1</sub> = 0.0323<br><i>wR</i> <sub>2</sub> = 0.0655            | <i>R</i> <sub>1</sub> = 0.0469<br><i>wR</i> <sub>2</sub> = 0.0961             |
| <i>R</i> indices(all data)                                   | <i>R</i> <sub>1</sub> = 0.0419                                               | <i>R</i> <sub>1</sub> = 0.0768                                                |

|                                  |                  |                  |
|----------------------------------|------------------|------------------|
| Residual( $e \text{ \AA}^{-3}$ ) | $wR_2 = 0.0710$  | $wR_2 = 0.1102$  |
|                                  | $0.600 / -0.623$ | $1.192 / -1.109$ |

---

${}^a R_1 = \sum ||F_o| - |F_c|| / \sum |F_o|$ ;  ${}^b wR_2 = \{ \sum [w(F_o^2 - F_c^2)^2] / \sum [w(F_o^2)^2] \}^{1/2}$

**Table S2** The assignment of IR bands of **1** and **2**

| <b>1</b> | <b>2</b> | assignments                                                                        |
|----------|----------|------------------------------------------------------------------------------------|
| 3010s    | 3010s    | $\nu_{\text{as}}$ (CH <sub>3</sub> )                                               |
| 2984s    | 2987s    | $\nu_{\text{as}}$ (CH <sub>3</sub> )                                               |
| 2966s    | 2970s    | $\nu_{\text{as}}$ (CH <sub>3</sub> )                                               |
| 2949s    | 2952s    | $\nu_{\text{as}}$ (CH <sub>2</sub> )                                               |
| 2882s    | 2882s    | $\nu_{\text{s}}$ (CH <sub>3</sub> )                                                |
| 1460s    | 1461s    | $\delta_{\text{s}}$ (CH <sub>2</sub> ) and $\delta_{\text{as}}$ (CH <sub>3</sub> ) |
| 1349s    | 1345s    | $\nu_{\text{s}}$ (NC <sub>3</sub> )                                                |
| 1319s    | 1317s    | $\nu$ (C-N)                                                                        |
| 1115s    | 1116s    | $\nu$ (C-N)                                                                        |
| 1050s    | 1051s    | $\nu$ (C-N) and $\nu_{\text{as}}$ (C-C)                                            |
| 1003s    | 1000s    | $\delta$ (C-N)                                                                     |
| 837s     | 836s     | $\delta$ (CH <sub>2</sub> ) <sub>2</sub>                                           |
| 792s     | 795s     | $\delta$ (CH <sub>2</sub> ) <sub>2</sub>                                           |

**Table S3** Bond lengths [Å] for **1** at 273 K

| Atom pair                   | Distance / Å | Atom pair                   | Distance / Å |
|-----------------------------|--------------|-----------------------------|--------------|
| Ag(1)-Ag(1) <sup>#1</sup>   | 1.4299(14)   | Ag(1)-Ag(1) <sup>#2</sup>   | 2.475(2)     |
| Ag(1)-Ag(1) <sup>#3</sup>   | 1.4299(14)   | Ag(1)-Ag(1) <sup>#4</sup>   | 2.475(2)     |
| Ag(1)-Ag(1) <sup>#5</sup>   | 2.859(3)     | Ag(1)-Ag(2)                 | 2.944(9)     |
| Ag(1)-I(1) <sup>#1</sup>    | 2.753(3)     | Ag(1)-I(1)                  | 2.790(3)     |
| Ag(1)-Ag(2A) <sup>#5</sup>  | 2.874(8)     | Ag(1)-Ag(2A) <sup>#2</sup>  | 2.839(8)     |
| Ag(2)-I(1) <sup>#2</sup>    | 2.972(3)     | Ag(2)-I(1)                  | 2.972(3)     |
| Ag(2)-I(1) <sup>#4</sup>    | 2.972(3)     | Ag(2)-N(1)                  | 2.442(13)    |
| N(1)-Ag(2A) <sup>#4</sup>   | 2.432(10)    | N(1)-Ag(2A)                 | 2.432(10)    |
| N(1)-Ag(2A) <sup>#2</sup>   | 2.432(10)    | Ag(2A)-Ag(2A) <sup>#2</sup> | 0.75(3)      |
| Ag(2A)-Ag(2A) <sup>#4</sup> | 0.75(3)      |                             |              |

Symmetry codes: #1  $y, -z+1/2, x-1/2$ ; #2  $-y+1, z+1/2, -x+1/2$ ; #3  $z+1/2, x, -y+1/2$ ;

#4  $-z+1/2, -x+1, y-1/2$ ; #5  $-x+1, -y+1, -z$

**Table S4** Bond angles [°] for **1** at 273 K

| Atoms                                           | Angle / °   | Atoms                                            | Angle / °  |
|-------------------------------------------------|-------------|--------------------------------------------------|------------|
| Ag(1) <sup>#1</sup> -Ag(1)-Ag(1) <sup>#3</sup>  | 119.902(15) | Ag(1) <sup>#2</sup> -Ag(1)-Ag(1) <sup>#5</sup>   | 30.012(2)  |
| Ag(1) <sup>#1</sup> -Ag(1)-Ag(1) <sup>#2</sup>  | 90.0        | Ag(1) <sup>#4</sup> -Ag(1)-Ag(1) <sup>#5</sup>   | 30.012(2)  |
| Ag(1) <sup>#3</sup> -Ag(1)-Ag(1) <sup>#4</sup>  | 90.0        | Ag(1) <sup>#1</sup> -Ag(1)-Ag(1) <sup>#5</sup>   | 59.987(2)  |
| Ag(1) <sup>#3</sup> -Ag(1)-Ag(1) <sup>#2</sup>  | 30.048(8)   | Ag(1) <sup>#1</sup> -Ag(1)-Ag(1) <sup>#4</sup>   | 30.048(8)  |
| Ag(1) <sup>#4</sup> -Ag(1)-Ag(1) <sup>#2</sup>  | 60.0        | Ag(1) <sup>#3</sup> -Ag(1)-Ag(1) <sup>#5</sup>   | 59.987(2)  |
| Ag(1) <sup>#5</sup> -Ag(1)-Ag(2)                | 61.85(12)   | Ag(1) <sup>#4</sup> -Ag(1)-Ag(2)                 | 65.14(9)   |
| Ag(1) <sup>#3</sup> -Ag(1)-Ag(2)                | 77.56(13)   | Ag(1) <sup>#2</sup> -Ag(1)-Ag(2)                 | 65.14(9)   |
| Ag(1) <sup>#1</sup> -Ag(1)-Ag(2)                | 77.57(13)   | Ag(1) <sup>#1</sup> -Ag(1)-I(1) <sup>#1</sup>    | 76.50(15)  |
| Ag(1) <sup>#3</sup> -Ag(1)-I(1) <sup>#1</sup>   | 127.7(2)    | Ag(1) <sup>#2</sup> -Ag(1)-I(1)                  | 92.16(16)  |
| Ag(1) <sup>#2</sup> -Ag(1)-I(1) <sup>#1</sup>   | 127.75(4)   | Ag(1) <sup>#3</sup> -Ag(1)-I(1)                  | 73.62(14)  |
| Ag(1) <sup>#4</sup> -Ag(1)-I(1) <sup>#1</sup>   | 97.15(15)   | Ag(1) <sup>#1</sup> -Ag(1)-I(1)                  | 134.3(2)   |
| Ag(1) <sup>#4</sup> -Ag(1)-I(1)                 | 127.16(5)   | Ag(1) <sup>#2</sup> -Ag(1)-Ag(2A) <sup>#5</sup>  | 69.4(2)    |
| Ag(1) <sup>#4</sup> -Ag(1)-Ag(2A) <sup>#5</sup> | 73.7(4)     | Ag(1) <sup>#2</sup> -Ag(1)-Ag(2A) <sup>#2</sup>  | 73.5(4)    |
| Ag(1) <sup>#5</sup> -Ag(1)-Ag(2A) <sup>#5</sup> | 67.7(3)     | Ag(1) <sup>#1</sup> -Ag(1)-Ag(2A) <sup>#5</sup>  | 81.4(3)    |
| Ag(1) <sup>#3</sup> -Ag(1)-Ag(2A) <sup>#5</sup> | 74.2(2)     | Ag(1) <sup>#4</sup> -Ag(1)-Ag(2A) <sup>#2</sup>  | 68.6(2)    |
| Ag(1) <sup>#1</sup> -Ag(1)-Ag(2A) <sup>#2</sup> | 76.9(2)     | Ag(1) <sup>#3</sup> -Ag(1)-Ag(2A) <sup>#2</sup>  | 84.9(3)    |
| I(1) <sup>#1</sup> -Ag(1)-Ag(1) <sup>#5</sup>   | 114.42(10)  | I(1)-Ag(1)-Ag(1) <sup>#5</sup>                   | 112.46(11) |
| I(1) <sup>#1</sup> -Ag(1)-Ag(2)                 | 150.80(16)  | I(1)-Ag(1)-Ag(2)                                 | 62.37(9)   |
| I(1) <sup>#1</sup> -Ag(1)-I(1)                  | 132.83(7)   | I(1)-Ag(1)-Ag(2A) <sup>#2</sup>                  | 60.3(2)    |
| I(1)-Ag(1)-Ag(2A) <sup>#5</sup>                 | 141.1(3)    | I(1) <sup>#1</sup> -Ag(1)-Ag(2A) <sup>#2</sup>   | 145.5(3)   |
| I(1) <sup>#1</sup> -Ag(1)-Ag(2A) <sup>#5</sup>  | 58.82(19)   | Ag(2A) <sup>#2</sup> -Ag(1)-Ag(2A) <sup>#5</sup> | 136.6(6)   |
| Ag(2A) <sup>#2</sup> -Ag(1)-Ag(1) <sup>#5</sup> | 68.9(3)     | Ag(1) <sup>#2</sup> -Ag(2)-Ag(1) <sup>#1</sup>   | 57.7(2)    |
| Ag(1) <sup>#4</sup> -Ag(2)-Ag(1) <sup>#1</sup>  | 27.91(9)    | Ag(1) <sup>#5</sup> -Ag(2)-Ag(1) <sup>#1</sup>   | 49.03(17)  |
| Ag(1)-Ag(2)-Ag(1) <sup>#1</sup>                 | 27.91(9)    | Ag(1) <sup>#2</sup> -Ag(2)-Ag(1) <sup>#3</sup>   | 27.91(9)   |
| Ag(1) <sup>#4</sup> -Ag(2)-Ag(1)                | 49.72(17)   | Ag(1) <sup>#2</sup> -Ag(2)-Ag(1) <sup>#4</sup>   | 49.72(17)  |
| Ag(1) <sup>#4</sup> -Ag(2)-Ag(1) <sup>#3</sup>  | 57.7(2)     | Ag(1) <sup>#2</sup> -Ag(2)-Ag(1) <sup>#5</sup>   | 27.91(9)   |
| Ag(1)-Ag(2)-Ag(1) <sup>#3</sup>                 | 27.91(9)    | Ag(1) <sup>#5</sup> -Ag(2)-Ag(1) <sup>#3</sup>   | 49.03(17)  |
| Ag(1) <sup>#2</sup> -Ag(2)-Ag(1)                | 49.72(17)   | Ag(1)-Ag(2)-Ag(1) <sup>#5</sup>                  | 57.7(2)    |
| Ag(1) <sup>#3</sup> -Ag(2)-Ag(1) <sup>#1</sup>  | 49.03(17)   | Ag(1)-Ag(2)-I(1) <sup>#4</sup>                   | 79.9(2)    |
| Ag(1) <sup>#4</sup> -Ag(2)-Ag(1) <sup>#5</sup>  | 27.91(9)    | Ag(1)-Ag(2)-I(1)                                 | 56.28(13)  |
| Ag(1) <sup>#2</sup> -Ag(2)-I(1) <sup>#2</sup>   | 56.28(13)   | Ag(1) <sup>#4</sup> -Ag(2)-I(1)                  | 105.8(3)   |
| Ag(1)-Ag(2)-I(1) <sup>#2</sup>                  | 105.8(3)    | Ag(1) <sup>#2</sup> -Ag(2)-I(1) <sup>#4</sup>    | 105.8(3)   |
| Ag(1) <sup>#4</sup> -Ag(2)-I(1) <sup>#4</sup>   | 56.28(13)   | Ag(1) <sup>#2</sup> -Ag(2)-I(1)                  | 79.9(2)    |
| Ag(1) <sup>#4</sup> -Ag(2)-I(1) <sup>#2</sup>   | 79.9(2)     | I(1)-Ag(2)-Ag(1) <sup>#3</sup>                   | 55.07(12)  |
| I(1) <sup>#4</sup> -Ag(2)-Ag(1) <sup>#5</sup>   | 82.5(2)     | I(1) <sup>#2</sup> -Ag(2)-Ag(1) <sup>#5</sup>    | 55.07(12)  |
| I(1)-Ag(2)-Ag(1) <sup>#5</sup>                  | 104.1(3)    | I(1) <sup>#4</sup> -Ag(2)-Ag(1) <sup>#1</sup>    | 55.07(12)  |
| I(1)-Ag(2)-Ag(1) <sup>#1</sup>                  | 82.5(2)     | I(1) <sup>#2</sup> -Ag(2)-Ag(1) <sup>#1</sup>    | 104.1(3)   |
| I(1) <sup>#2</sup> -Ag(2)-Ag(1) <sup>#3</sup>   | 82.5(2)     | I(1) <sup>#2</sup> -Ag(2)-I(1) <sup>#4</sup>     | 117.01(12) |
| I(1) <sup>#4</sup> -Ag(2)-Ag(1) <sup>#3</sup>   | 104.1(3)    | I(1) <sup>#2</sup> -Ag(2)-I(1)                   | 117.01(12) |
| I(1) <sup>#4</sup> -Ag(2)-I(1)                  | 117.01(12)  | N(1)-Ag(2)-Ag(1)                                 | 150.96(10) |
| N(1)-Ag(2)-Ag(1) <sup>#1</sup>                  | 151.37(10)  | N(1)-Ag(2)-Ag(1) <sup>#2</sup>                   | 150.96(10) |



|                                                  |            |                                                   |            |
|--------------------------------------------------|------------|---------------------------------------------------|------------|
| N(1)-Ag(2)-Ag(1) <sup>#4</sup>                   | 150.96(10) | N(1)-Ag(2)-Ag(1) <sup>#3</sup>                    | 151.37(10) |
| N(1)-Ag(2)-Ag(1) <sup>#5</sup>                   | 151.37(10) | N(1)-Ag(2)-I(1) <sup>#4</sup>                     | 100.1(2)   |
| N(1)-Ag(2)-I(1) <sup>#2</sup>                    | 100.1(2)   | Ag(1) <sup>#3</sup> -I(1)-Ag(1)                   | 29.89(5)   |
| N(1)-Ag(2)-I(1)                                  | 100.1(2)   | Ag(1)-I(1)-Ag(2)                                  | 61.3(2)    |
| Ag(1) <sup>#3</sup> -I(1)-Ag(2)                  | 62.7(2)    | C(1)-N(1)-Ag(2)                                   | 110.3(3)   |
| C(1) <sup>#4</sup> -N(1)-Ag(2)                   | 110.3(3)   | C(1)-N(1)-Ag(2A) <sup>#4</sup>                    | 100.9(5)   |
| C(1) <sup>#2</sup> -N(1)-Ag(2)                   | 110.3(3)   | C(1) <sup>#2</sup> -N(1)-Ag(2A)                   | 100.9(5)   |
| C(1) <sup>#2</sup> -N(1)-Ag(2A) <sup>#4</sup>    | 118.3(5)   | C(1)-N(1)-Ag(2A) <sup>#2</sup>                    | 118.3(5)   |
| C(1) <sup>#4</sup> -N(1)-Ag(2A) <sup>#4</sup>    | 111.2(4)   | C(1) <sup>#2</sup> -N(1)-Ag(2A) <sup>#2</sup>     | 111.2(4)   |
| C(1) <sup>#4</sup> -N(1)-Ag(2A)                  | 118.3(5)   | C(1) <sup>#4</sup> -N(1)-Ag(2A) <sup>#2</sup>     | 100.9(5)   |
| C(1)-N(1)-Ag(2A)                                 | 111.2(4)   | Ag(2A)-N(1)-Ag(2A) <sup>#4</sup>                  | 17.7(7)    |
| Ag(2A)-N(1)-Ag(2A) <sup>#2</sup>                 | 17.7(7)    | Ag(1) <sup>#5</sup> -Ag(2A)-Ag(1) <sup>#1</sup>   | 49.16(13)  |
| Ag(2A) <sup>#2</sup> -N(1)-Ag(2A) <sup>#4</sup>  | 17.7(7)    | Ag(1) <sup>#2</sup> -Ag(2A)-Ag(1)                 | 46.92(17)  |
| Ag(1) <sup>#1</sup> -Ag(2A)-Ag(1)                | 26.32(10)  | Ag(1) <sup>#5</sup> -Ag(2A)-Ag(1) <sup>#3</sup>   | 47.48(16)  |
| Ag(1) <sup>#4</sup> -Ag(2A)-Ag(1) <sup>#3</sup>  | 55.83(17)  | Ag(1) <sup>#4</sup> -Ag(2A)-Ag(1) <sup>#2</sup>   | 49.96(13)  |
| Ag(1) <sup>#1</sup> -Ag(2A)-Ag(1) <sup>#3</sup>  | 46.29(16)  | Ag(1) <sup>#5</sup> -Ag(2A)-Ag(1) <sup>#2</sup>   | 28.00(8)   |
| Ag(1) <sup>#2</sup> -Ag(2A)-Ag(1) <sup>#1</sup>  | 56.14(16)  | Ag(1) <sup>#4</sup> -Ag(2A)-Ag(1) <sup>#1</sup>   | 27.71(8)   |
| Ag(1) <sup>#2</sup> -Ag(2A)-Ag(1) <sup>#3</sup>  | 26.23(10)  | Ag(1) <sup>#4</sup> -Ag(2A)-Ag(1) <sup>#5</sup>   | 28.98(8)   |
| Ag(1) <sup>#4</sup> -Ag(2A)-Ag(1)                | 48.02(16)  | Ag(1) <sup>#5</sup> -Ag(2A)-Ag(1)                 | 55.93(17)  |
| Ag(1)-Ag(2A)-Ag(1) <sup>#3</sup>                 | 25.75(10)  | N(1)-Ag(2A)-Ag(1) <sup>#1</sup>                   | 146.0(5)   |
| N(1)-Ag(2A)-Ag(1) <sup>#4</sup>                  | 163.4(5)   | N(1)-Ag(2A)-Ag(1)                                 | 135.6(6)   |
| N(1)-Ag(2A)-Ag(1) <sup>#2</sup>                  | 146.5(5)   | N(1)-Ag(2A)-Ag(1) <sup>#3</sup>                   | 136.4(7)   |
| N(1)-Ag(2A)-Ag(1) <sup>#5</sup>                  | 164.7(4)   | Ag(2A) <sup>#4</sup> -Ag(2A)-Ag(1) <sup>#3</sup>  | 56.0(2)    |
| Ag(2A) <sup>#4</sup> -Ag(2A)-Ag(1) <sup>#2</sup> | 69.6(6)    | Ag(2A) <sup>#4</sup> -Ag(2A)-Ag(1) <sup>#4</sup>  | 111.8(3)   |
| Ag(2A) <sup>#4</sup> -Ag(2A)-Ag(1) <sup>#5</sup> | 97.6(6)    | Ag(2A) <sup>#2</sup> -Ag(2A)-Ag(1) <sup>#3</sup>  | 71.0(5)    |
| Ag(2A) <sup>#2</sup> -Ag(2A)-Ag(1) <sup>#2</sup> | 97.2(6)    | Ag(2A) <sup>#2</sup> -Ag(2A)-Ag(1) <sup>#5</sup>  | 111.5(3)   |
| Ag(2A) <sup>#2</sup> -Ag(2A)-Ag(1)               | 55.6(2)    | Ag(2A) <sup>#4</sup> -Ag(2A)-Ag(1)                | 69.3(5)    |
| Ag(2A) <sup>#2</sup> -Ag(2A)-Ag(1) <sup>#4</sup> | 96.1(6)    | Ag(2A) <sup>#2</sup> -Ag(2A)-N(1)                 | 81.2(4)    |
| Ag(2A) <sup>#4</sup> -Ag(2A)-N(1)                | 81.2(4)    | Ag(2A) <sup>#2</sup> -Ag(2A)-Ag(2A) <sup>#4</sup> | 59.997(5)  |

Symmetry codes: #1  $y, -z+1/2, x-1/2$ ; #2  $-y+1, z+1/2, -x+1/2$ ; #3  $z+1/2, x, -y+1/2$ ;

#4  $-z+1/2, -x+1, y-1/2$ ; #5  $-x+1, -y+1, -z$

**Table S5** Bond lengths [Å] for **2** at 273 K

| Atom pair                   | Distance / Å | Atom pair                   | Distance / Å |
|-----------------------------|--------------|-----------------------------|--------------|
| Ag(1)-Ag(2) <sup>#1</sup>   | 2.9811(19)   | Ag(1)-Br(1)                 | 2.5774(19)   |
| Ag(1)-Br(2)                 | 2.7423(19)   | Ag(1)-Br(3)                 | 2.666(2)     |
| Ag(1)-N(1)                  | 2.499(13)    | Ag(2)-Br(1)                 | 2.746(2)     |
| Ag(2)-Br(2) <sup>#2</sup>   | 2.819(2)     | Ag(2)-Br(2) <sup>#3</sup>   | 2.912(2)     |
| Ag(2)-Br(3) <sup>#2</sup>   | 2.860(2)     | Ag(3)-Ag(4) <sup>#4</sup>   | 2.9761(16)   |
| Ag(3)-Br(4)                 | 2.5805(19)   | Ag(3)-Br(5)                 | 2.666(2)     |
| Ag(3)-Br(6)                 | 2.746(2)     | Ag(3)-N(5)                  | 2.491(11)    |
| Ag(4)-Br(4)                 | 2.7384(19)   | Ag(4)-Br(5) <sup>#5</sup>   | 2.867(2)     |
| Ag(4)-Br(6) <sup>#6</sup>   | 2.912(2)     | Ag(4)-Br(6) <sup>#5</sup>   | 2.822(2)     |
| Ag(5)-Ag(6) <sup>#7</sup>   | 2.9980(17)   | Ag(5)-Br(7)                 | 2.628(2)     |
| Ag(5)-Br(8)                 | 2.5801(19)   | Ag(5)-Br(9) <sup>#5</sup>   | 2.817(2)     |
| Ag(5)-N(6)                  | 2.534(10)    | Ag(6)-Br(7) <sup>#2</sup>   | 2.816(2)     |
| Ag(6)-Br(8)                 | 2.7281(18)   | Ag(6)-Br(9) <sup>#7</sup>   | 2.7650(18)   |
| Ag(6)-Br(9)                 | 2.750(2)     | Ag(7)-Ag(8)                 | 3.2846(18)   |
| Ag(7)-Br(12)                | 2.609(2)     | Ag(7)-Br(13)                | 2.586(2)     |
| Ag(7)-Br(15) <sup>#5</sup>  | 2.800(2)     | Ag(7)-N(8)                  | 2.516(11)    |
| Ag(8)-Ag(9)                 | 3.164(2)     | Ag(8)-Ag(10)                | 3.099(2)     |
| Ag(8)-Br(10) <sup>#2</sup>  | 2.810(2)     | Ag(8)-Br(11)                | 2.703(2)     |
| Ag(8)-Br(14)                | 2.714(2)     | Ag(8)-Br(15) <sup>#5</sup>  | 2.908(2)     |
| Ag(9)-Ag(10) <sup>#5</sup>  | 2.970(2)     | Ag(9)-Br(10)                | 2.687(2)     |
| Ag(9)-Br(11)                | 2.649(2)     | Ag(9)-Br(12)                | 2.664(2)     |
| Ag(9)-Br(15) <sup>#5</sup>  | 3.000(2)     | Ag(10)-Br(10) <sup>#2</sup> | 2.859(2)     |
| Ag(10)-Br(13)               | 2.6286(19)   | Ag(10)-Br(14)               | 2.674(2)     |
| Ag(10)-Br(15)               | 2.770(2)     | Ag(11)-Ag(13)               | 3.293(2)     |
| Ag(11)-Br(18)               | 2.6015(19)   | Ag(11)-Br(19)               | 2.585(2)     |
| Ag(11)-Br(20) <sup>#2</sup> | 2.801(2)     | Ag(11)-N(11)                | 2.518(12)    |
| Ag(12)-Ag(13)               | 3.161(2)     | Ag(12)-Ag(14) <sup>#2</sup> | 2.964(2)     |
| Ag(12)-Br(16)               | 2.658(2)     | Ag(12)-Br(18)               | 2.672(3)     |
| Ag(12)-Br(20) <sup>#2</sup> | 2.9898(19)   | Ag(12)-Br(21)               | 2.683(2)     |
| Ag(13)-Ag(14)               | 3.101(2)     | Ag(13)-Br(16)               | 2.704(2)     |
| Ag(13)-Br(17)               | 2.710(2)     | Ag(13)-Br(20) <sup>#2</sup> | 2.905(2)     |
| Ag(13)-Br(21) <sup>#5</sup> | 2.807(2)     | Ag(14)-Br(17)               | 2.675(2)     |
| Ag(14)-Br(19)               | 2.638(2)     | Ag(14)-Br(20)               | 2.772(2)     |
| Ag(14)-Br(21) <sup>#5</sup> | 2.851(2)     | Ag(15)-Ag(16) <sup>#8</sup> | 3.0029(19)   |
| Ag(15)-Br(22)               | 2.5810(19)   | Ag(15)-Br(23) <sup>#2</sup> | 2.8146(17)   |
| Ag(15)-Br(24)               | 2.630(2)     | Ag(15)-N(12)                | 2.564(12)    |
| Ag(16)-Br(22)               | 2.734(2)     | Ag(16)-Br(23)               | 2.7480(19)   |
| Ag(16)-Br(23) <sup>#8</sup> | 2.769(2)     | Ag(16)-Br(24) <sup>#5</sup> | 2.811(2)     |

Symmetry codes: #1 -x+1,y-1/2,-z+2; #2 x,y+1,z; #3 -x+1,y+1/2,-z+2; #4 -x,y+1/2,-z+1; #5 x,y-1,z; #6 -x,y-1/2,-z+1; #7 -x+1,y-1/2,-z+1; #8 -x+2,y+1/2,-z; #9 -x+1,y+1/2,-z+1; #10 -x+2,y-1/2,-z

## D. References

1. V. I. Kovalenko, A. A. Akhmadiyarov, A. E. Vandyukov, A. R. Khamatgalimov, *J. Mol. Struct.* 2012, **1028**, 134–140.
2. J. X. Yu, M. Cui, X. Z. Liu, Q. Q. Chen, Y. Wu, Y. M. He, *Mater. Lett.*, 2017, **193**, 73–76.
